# Supplementary material
Source: Elsevier journal article supplement (https://www.sciencedirect.com/science/article/pii/S0213911116301686)
Supplement: mmc1 [file S0213911116301686:mmc1.pdf]

## Annex I. Questionnaire used in the study

## DATA OF THE PERSON INTERVIEWED

Interview nº \_\_\_\_\_

Name and

Surname: \_\_\_\_\_

Sex: Male <sup>1</sup> Female <sup>2</sup> Age: \_\_\_\_\_ Programme participant: YES <sup>1</sup>  
NO <sup>2</sup>

Telephone no: \_\_\_\_\_ Country of

birth: \_\_\_\_\_

Town \_\_\_\_\_ of \_\_\_\_\_ residence: \_\_\_\_\_

Health Department: Sagunto <sup>1</sup> Castellón <sup>2</sup> Valencia la fe <sup>3</sup> Denia <sup>4</sup>

## 1. Do you have any relatives who have suffered from any type of cancer?

Yes <sup>1</sup> No <sup>2</sup> NA <sup>9</sup>1A. or any close friend or acquaintance? Yes <sup>1</sup> No <sup>2</sup> NA <sup>9</sup>

## 2. What is your level of education?

Can't read or write <sup>1</sup>

Primary education (read and write, primary and lower secondary school) <sup>2</sup>

Secondary education (upper secondary) <sup>3</sup>

University (tertiary education) <sup>4</sup>

NA <sup>9</sup>

## 3. Who lives in the family home? Do you live alone, with a partner, children... (Multiple response)

Alone/ (go to q5) <sup>1</sup>

Partner/spouse/husband/wife <sup>2</sup>

Children <sup>3</sup>

Parents/parents-in-law <sup>4</sup>

Others \_\_\_\_\_ <sup>5</sup>

NA <sup>9</sup>

## 4. Do any of the people you live with require SPECIAL CARE, because they are under age 15 or over age 75, or because they have some kind of disability or handicap?

YES <sup>1</sup> NO <sup>1</sup> (go to 5) NA <sup>9</sup>

## 4A. Who is the primary caregiver? You, your partner, between you and your partner... (Multiple response)

You <sup>1</sup>

Your partner/spouse/husband <sup>2</sup>

Shared care <sup>3</sup>

External care <sup>4</sup>

Others \_\_\_\_\_ <sup>5</sup>

NA <sup>9</sup>

**5. Do you currently work?**

- Yes (go to 6) <sup>1</sup>
- No (go to 5A) <sup>2</sup>
- NA <sup>9</sup>

**5A. What is your current work status?**

- Unemployed <sup>1</sup>
- Retired <sup>2</sup>
- Homemaker <sup>3</sup>
- Others \_\_\_\_\_ <sup>4</sup>
- NA <sup>9</sup>

**5B. Did you work previously?**

- Yes <sup>1</sup> (go to 6)
- No <sup>2</sup> (go to 7)
- NA <sup>9</sup>

**6. What is your current job? (if you are not currently working but have worked in the past) What was your main employment during your working life?**

(Literal) Occupation: \_\_\_\_\_

**6A. What is your position or job title? (if you are not currently working but have worked in the past) What was your position or job title?**

(Literal) Position/job title: \_\_\_\_\_

**7. (only for those who are married or living with someone) What is the current employment OF YOUR PARTNER/SPOUSE/HUSBAND, and if he/she doesn't currently work, what was his/her main employment during his/her working life?**

(Literal) Occupation: \_\_\_\_\_

**7A. What position or job title does/did he/she hold?**

(Literal) Position/job title: \_\_\_\_\_

**8. (only for those born outside Spain) How long have you lived in Spain?**

(Literal) \_\_\_\_\_

**9. In the last 12 months would you say your health status has been?**

- Very good <sup>1</sup>
- Good <sup>2</sup>
- Fair <sup>3</sup>
- Poor <sup>4</sup>
- Very poor <sup>5</sup>
- Na <sup>9</sup>

**10. Have you ever heard about Colorectal Cancer (CRC)?**

- Yes <sup>1</sup> No <sup>2</sup> (go to 13) NA <sup>9</sup>

**11. I am going to read you a series of statements about CRC and I want you to answer if you think the statements are true, false or you don't know. (read all the statements)**

|                                                                               | True | False | I don't know | NA |
|-------------------------------------------------------------------------------|------|-------|--------------|----|
| a) CRC affects women more than men                                            | 1    | 2     | 8            | 9  |
| b) CRC affects people over the age of about 50                                | 1    | 2     | 8            | 9  |
| c) A history of family CRC does not affect the development of CRC             | 1    | 2     | 8            | 9  |
| d) Eating lots of meat and few vegetables could affect the development of CRC | 1    | 2     | 8            | 9  |
| e) Not taking any physical exercise could affect the development of CRC       | 1    | 2     | 8            | 9  |

12. Now I would like you to tell me if you think that the symptoms I am going to read out to you are linked to CRC. Say Yes, No or I don't know. Do you think that \_\_\_\_\_ is a symptom of CRC?

|                                             | Yes | No | I don't know | NA |
|---------------------------------------------|-----|----|--------------|----|
| a) Constipation and/or persistent diarrheas | 1   | 2  | 8            | 9  |
| b) Vomiting                                 | 1   | 2  | 8            | 9  |
| c) Blood in stools                          | 1   | 2  | 8            | 9  |
| d) Headache                                 | 1   | 2  | 8            | 9  |
| e) Loss of weight for no known reason       | 1   | 2  | 8            | 9  |

13. Say as honestly as possible if you practice any of the following...

|                                                                                          | Yes | No | NA |
|------------------------------------------------------------------------------------------|-----|----|----|
| a) Do you eat at least four portions of fruit or vegetables per day?                     | 1   | 2  | 9  |
| b) Do you take exercise at least 2 or 3 times a week?                                    | 1   | 2  | 9  |
| c) Do you visit the doctor if you have a health problem?                                 | 1   | 2  | 9  |
| d) ( <i>women only</i> ) Are you a participant in the Breast Cancer Screening Programme? | 1   | 2  | 9  |

14. Do you think your chances of developing CRC in the future are high, moderate or low?

High <sup>1</sup> Moderate <sup>2</sup> Low <sup>3</sup> Don't know <sup>8</sup> NA <sup>9</sup>

15. I would like you to order the following cancers (*read out depending on if the subject is male or female*) from 1 to 3, with 1 being the cancer you consider to be the most serious for women/men (*if it's a woman say "for women" and if it's a man say "for men"*), that is in your opinion which causes most deaths in women/men (*ditto*).

| ( <i>women only</i> ) | ORDER | ( <i>men only</i> )  | ORDER |
|-----------------------|-------|----------------------|-------|
| a) Lung Cancer        |       | a) Lung Cancer       |       |
| b) Breast Cancer      |       | b) Prostate Cancer   |       |
| c) Colorectal Cancer  |       | c) Colorectal Cancer |       |

16. Are you aware of the existence of the CRC Screening Programme in the Valencia Region?

YES <sup>1</sup> NO <sup>2</sup> (**go to 20**) NA <sup>9</sup>

**17. I would like you to tell me if you have received information about the programme from any of the following channels I am going to read out. Have you received information about the Programme through...? (read out all the options)**

|                                                           | Yes | No | I don't know | NA |
|-----------------------------------------------------------|-----|----|--------------|----|
| a) ... the letter and Programme leaflet sent to your home | 1   | 2  | 8            | 9  |
| b) ... the TV, Radio, newspapers                          | 1   | 2  | 8            | 9  |
| c) ... internet                                           | 1   | 2  | 8            | 9  |
| d) ... your GP                                            | 1   | 2  | 8            | 9  |
| e) ...a family member or friend                           | 1   | 2  | 8            | 9  |

**18. Of the different channels we have just talked about, I would like you to tell me if you consider them appropriate for receiving information about the programme. Do you consider ..... to be an appropriate way to receive information about the programme? (and so on with all the options)**

|                                                           | Yes | No | I don't know | NA |
|-----------------------------------------------------------|-----|----|--------------|----|
| a) ... the letter and Programme leaflet sent to your home | 1   | 2  | 8            | 9  |
| b) ... the TV, Radio, newspapers                          | 1   | 2  | 8            | 9  |
| c) ... internet                                           | 1   | 2  | 8            | 9  |
| d) ... your GP                                            | 1   | 2  | 8            | 9  |
| e) ... a family member or friend                          | 1   | 2  | 8            | 9  |

**19. I am going to read out some statements about the Colorectal Cancer Screening Programme and I would like you to answer true, false or don't know.**

|                                                                                                                               | True | False | I don't know | NA |
|-------------------------------------------------------------------------------------------------------------------------------|------|-------|--------------|----|
| a) Both women and men can take part in the programme                                                                          | 1    | 2     | 8            | 9  |
| b) You have to have CRC symptoms to take part in the programme                                                                | 1    | 2     | 8            | 9  |
| c) The first test consists of giving a stool sample                                                                           | 1    | 2     | 8            | 9  |
| d) You can take part in the programme from approximately age 50                                                               | 1    | 2     | 8            | 9  |
| e) The first test consists of a colonoscopy                                                                                   | 1    | 2     | 8            | 9  |
| f) The test allows CRC to be detected before the onset of any symptoms                                                        | 1    | 2     | 8            | 9  |
| g) If CRC is detected in time, the majority of cases can be cured                                                             | 1    | 2     | 8            | 9  |
| h) Some people may have to undergo more tests after the first test and ultimately the majority of these people don't have CRC | 1    | 2     | 8            | 9  |
| i) It could be that a person has CRC and it is not detected in the programme                                                  | 1    | 2     | 8            | 9  |

**20. (for participants only) According to our records you TOOK PART in the CRC Screening Programme. I am going to read out a series of reasons and I would like you to tell me if they influenced your decision to TAKE PART or not. You TOOK PART because... (Multiple response)**

|                                                                                        | Yes | No | I don't know | NA |
|----------------------------------------------------------------------------------------|-----|----|--------------|----|
| 1 a) ... a family member or friend recommended it?                                     | 1   | 2  | 8            | 9  |
| 2 b) ... you think that if CRC is detected in time the majority of cases can be cured? | 1   | 2  | 8            | 9  |
| 3 c) ...you felt unwell and thought you had symptoms of the illness?                   | 1   | 2  | 8            | 9  |
| 4 d) ... you thought it was a simple test?                                             | 1   | 2  | 8            | 9  |
| 5 e) ... your GP recommended it?                                                       | 1   | 2  | 8            | 9  |
| 6 f) ... you wanted to rule out the possibility of having CRC?                         | 1   | 2  | 8            | 9  |
| 7 g) ... you thought it was important for your health?                                 | 1   | 2  | 8            | 9  |
| 8 h) ... you had a family member/friend who had suffered from CRC?                     | 1   | 2  | 8            | 9  |
| 9 i) Any other reason?: _____                                                          | 1   | 2  | 8            | 9  |

**21. (for non-participants only) According to our records you DID NOT TAKE PART in the CRC Screening Programme. I am going to read out a series of reasons and I would like you to tell me if they influenced your decision NOT TO TAKE PART or not. You DID NOT TAKE PART because... (Multiple response)**

|                                                           | Yes | No | Don't know | NA |
|-----------------------------------------------------------|-----|----|------------|----|
| 10 a) ... you were afraid you would be diagnosed with CRC | 1   | 2  | 8          | 9  |
| 11 b) .... you thought the test was unpleasant            | 1   | 2  | 8          | 9  |
| 12 c) ... you didn't want to have a colonoscopy           | 1   | 2  | 8          | 9  |
| 13 d) ... you were unclear about how the test was done    | 1   | 2  | 8          | 9  |
| 14 e) ...you had no symptoms and you didn't feel unwell   | 1   | 2  | 8          | 9  |
| 15 f) ...you did not have time to do the test             | 1   | 2  | 8          | 9  |
| 16 g) ... you were embarrassed to do the test             | 1   | 2  | 8          | 9  |
| 17 h) ... you had already undergone other CRC tests       | 1   | 2  | 8          | 9  |
| 18 i) ... you did not receive an invitation letter        | 1   | 2  | 8          | 9  |
| 19 j) Any other reason: _____                             | 1   | 2  | 8          | 9  |

**22. Would you say that the information provided is sufficient or insufficient for taking the decision to take part in the Programme? Sufficient <sup>1</sup> Insufficient <sup>2</sup> Don't know <sup>8</sup> NA <sup>9</sup>**

**23. And finally...Do you intend to take part in the Programme in the future?**

Yes <sup>1</sup> No <sup>2</sup> Don't know <sup>8</sup> NA <sup>9</sup>

MANY THANKS FOR YOUR COOPERATION
